1 **Title: Genotype-by-Environment Interactions Affecting Heterosis in Maize**

2

3 **Authors:**

4 Zhi Li<sup>\*</sup>, Lisa Coffey<sup>†</sup>, Jacob Garfin<sup>\*</sup>, Nathan D. Miller<sup>‡</sup>, Michael R. White<sup>§</sup>, Edgar P. Spalding<sup>‡</sup>,

5 Natalia de Leon<sup>§</sup>, Shawn M. Kaeppler<sup>§</sup>, Patrick S. Schnable<sup>†</sup>, Nathan M. Springer<sup>\*\*</sup>, Candice N.

6 Hirsch<sup>\*</sup>

7

8 **Institutional Affiliations:**

9 <sup>\*</sup> Department of Agronomy and Plant Genetics, University of Minnesota, Saint Paul, MN 55108

10 <sup>†</sup> Department of Agronomy, Iowa State University, Ames, IA 50011

11 <sup>‡</sup> Department of Botany, University of Wisconsin, Madison, WI 53706

12 <sup>§</sup> Department of Agronomy, University of Wisconsin, Madison, WI 53706

13 <sup>\*\*</sup> Department of Plant and Microbial Biology, University of Minnesota, Saint Paul, MN 55108

14

15

16

17

18

19

20

21

22

23

24 **Running Title:**

25 GxE of Maize Heterosis

26

27 **Key Words:**

28 Heterosis, Genotype x Environment, Hybrid, Inbred, Maize

29

30 **Corresponding Author:**

31 Candice N. Hirsch

32 1991 Upper Buford Circle

33 Saint Paul, MN 55108

34 612-301-9522

35 [cnhirsch@umn.edu](mailto:cnhirsch@umn.edu)

36

37

38

39

40

41

42

43

44

45 **ABSTRACT**

46 The environment can influence heterosis, the phenomena in which the offspring of two inbred  
47 parents exhibits phenotypic performance beyond the inbred parents for specific traits. In this  
48 study we measured 25 traits in a set of 47 maize hybrids and their inbred parents grown in 16  
49 different environments, and each had varying levels of average productivity. By quantifying 25  
50 vegetative and reproductive traits across the life cycle we were able to analyze interactions  
51 between the environment and multiple distinct instances of heterosis. The magnitude and rank  
52 among hybrids of better-parent heterosis (BPH) varied for the different traits and environments.  
53 Across the traits, a higher within plot variance was observed for inbred lines compared to  
54 hybrids. However, for most traits, variance across environments was not significantly different  
55 for inbred lines compared to hybrids. Further, for many traits the correlations of BPH to hybrid  
56 performance and BPH to better parent performance were of comparable magnitude. These  
57 results indicate that inbreds and hybrids are showing similar trends in environmental response  
58 and are both contribute to genotype-by-environment interactions for heterosis. This study  
59 highlights that degree of heterosis is not an inherent trait of a specific hybrid, but varies  
60 depending on the trait measured and the environment where that trait is measured. Studies  
61 that attempt to correlate molecular processes with heterosis are hindered by the fact that  
62 heterosis is not a consistent attribute of a specific hybrid.

63

64

## 65 INTRODUCTION

66 Heterosis, or hybrid vigor, refers to the phenomena in which the offspring of two inbred  
67 parents exhibits phenotypic performance beyond the mid-parent or best parent used to  
68 generate the hybrid. Heterosis has been observed in many plant and animal species (Janick  
69 1998; Melchinger and Gumber 1998). Notably, the heterosis of mules (the ability to perform  
70 more work with fewer resources) was widely utilized in agriculture prior to mechanization  
71 (Troyer 2006). Inbreeding depression and heterosis in maize was initially documented by  
72 George H. Shull and Edward M. East (East 1908; Shull 1908; Shull 1909). The adoption of hybrid  
73 maize over open-pollinated varieties occurred remarkably fast due to improved yields, greater  
74 uniformity for machine harvesting, and increased durability under extreme abiotic stress. In just  
75 a four-year period of time, hybrid maize acreage went from less than 10% to over 90% in Iowa  
76 (Crow 1998). The widespread utilization of heterosis now shapes breeding programs for several  
77 agriculturally important species including maize and rice.

78 There is widespread interest in developing methods to characterize the molecular basis of  
79 heterosis, and to predict hybrid performance to increase the efficiency of hybrid breeding  
80 programs. Researchers have attempted to utilize genomic sequence (Riedelsheimer et al. 2012),  
81 RNA expression levels of genes (Melchinger and Gumber 1998; Frisch et al. 2010; Scholten and  
82 Thiemann 2013), sRNAs (Groszmann et al. 2011; Zhang et al. 2014), proteomic (Dahal et al.  
83 2012), and metabolomic (Riedelsheimer et al. 2012; de Abreu et al. 2017) data to predict or  
84 dissect heterosis (Schnable and Springer 2013). While relationships have been identified using  
85 each of these data types, no data type is able to completely predict hybrid performance  
86 individually (Kaepler 2012). Attempts to predict hybrid performance are complicated by the

87 fact that heterosis levels vary for different traits within the same hybrid (Flint-Garcia et al.  
88 2009).

89 Although plant breeders have noticed that hybrid genotypes are more stress tolerant than  
90 their inbred parents, there are few published reports to support this conclusion, particularly in  
91 environments with moderate rather than extreme levels of abiotic stress. In *Arabidopsis*, stress  
92 response gene expression networks have been shown to contribute to heterosis and the  
93 prediction of hybrid performance (Groszmann et al. 2015; Miller et al. 2015). While variation in  
94 levels of heterosis have been observed under different growing conditions, there are few  
95 studies that document changes in heterosis across diverse environmental conditions and traits.

96 In this study we measured 25 traits in 47 maize hybrids and their inbred parents that were  
97 grown in 16 different environments. The objective of the study was to document variation in  
98 estimates of heterosis across traits and environments. The results provide evidence that  
99 unravelling the molecular basis of heterosis is challenging because heterosis is not a fixed  
100 attribute of an individual across space, time, or environmental conditions.

101

## 102 **MATERIALS AND METHODS**

### 103 **Germplasm**

104 Eleven inbred lines were selected representing important founders in commercial maize  
105 breeding programs including DK3IHH6 (PI 564754), LH145 (PI 600959), LH185 (PI 576171), LH198  
106 (PI 557563), LH82 (PI 601170), PHB47 (PI 601009), PHK56 (PI 543842), PHK76 (PI 601496),  
107 PHN46 (PI 543844), PHP02 (PI 601570), and a recent release W606S. These inbred lines  
108 represent multiple heterotic groups including Iodent (DK3IHH6, PHP02), Non-Stiff Stalk (LH185,

109 LH82, PHK76, PHN46, PHK56, W606S), and Stiff Stalk (LH145, LH198, PHB47). These lines, with  
110 the exception of W606S, are all commercial inbred lines that have expired Plant Variety  
111 Protection certificates, and thus represent elite maize germplasm. These inbred lines were  
112 crossed in a partial diallel to generate 47 hybrid genotypes (see Table S1).

113 To evaluate genetic diversity between the parental lines used to generate the hybrid  
114 genotypes, genetic similarity between the parents was calculated using whole genome identity  
115 by state (Purcell et al. 2007) using 430,000 SNPs derived from RNA-sequencing (Hirsch et al.  
116 2014).

117

## 118 **Field Evaluations**

119 Trials containing single row plots (3.35 m long and 0.76 m apart) were planted in a total of 16  
120 environments in Iowa, Minnesota, and Wisconsin in the summer of 2015. The 16 environments  
121 were defined by location (5 separate locations), and management practices within location  
122 (planting date; high (70,000 plants ha<sup>-1</sup>) and low (20,000 plants ha<sup>-1</sup>) plant density). Arlington,  
123 WI and Waseca, MN had high and low planting densities, representing a total of four  
124 environments. Curtiss, IA, Kelly, IA, and St. Paul, MN had a factorial of high and low planting  
125 density and early and late planting at each site, representing a total of 12 environments (see  
126 Table S2). Within each location/management environment there were two replications and  
127 hybrids were blocked separately from inbred lines within each replication.

128 Twelve vegetative traits were measured on six representative plants per plot. These traits  
129 included plant height at 14, 21, 28, 35, 42, 49, 56, and 63 days after planting (DAP) measured as  
130 the distance from the soil surface to the uppermost leaf tip when the leaves were pulled

131 upright. Plant height at maturity was measured from the soil surface to the collar of the flag  
132 leaf, ear height at maturity was measured from the soil surface to the node subtending the  
133 uppermost ear. Leaf number above the ear, and leaf number (including senesced leaves) below  
134 the ear were counted after anthesis. Juvenile leaves were marked to allow leaf number  
135 including senesced leaves to be counted using previously described methods (Hirsch et al.  
136 2014). Days to anthesis and days to silk were measured on a per-plot basis as the day on which  
137 approximately half of the plants in the plot were shedding pollen and the day on which half of  
138 the plants in the plot had exposed silks, respectively. Custom computer algorithms executed on  
139 Open Science Grid computational resources (Pordes et al. 2007) in a workflow managed by  
140 HTCondor software (Thain et al. 2005) quantified eleven ear and kernel traits from digital  
141 images as previously described (Miller et al. 2017). Six representative ears per plot were  
142 measured. Ear weight and grain weight was an average of the weight of the uppermost ear on  
143 the six representative plants in the plot and cob weight was measured on individual uppermost  
144 ears from the six representative plants in the plot (Table 1 and see Table S3). For all traits for  
145 which single plant measurements were taken, the same six representative plants were used for  
146 all measurements. See Table S2 for details on which traits were measured in each environment  
147 and Table S3 for raw phenotypic values.

148

#### 149 **Statistical Analyses**

150 Better-parent heterosis (BPH) and percent better-parent heterosis (%BPH) were calculated for  
151 each trait and hybrid within each replicate block as  $BPH = \text{hybrid phenotype} - \text{better-parent}$   
152  $\text{phenotype}$  and  $\%BPH = ((\text{hybrid phenotype} - \text{better-parent phenotype})/\text{Better-parent}$

153 phenotype) x 100, respectively and then averaged across replicates within an environment. The  
154 average %BPH of the two replicates in each environment was used for subsequent analyses. For  
155 all traits except flowering time the higher parent was considered the better parent. For  
156 flowering time, the earlier parent was considered the better parent.

157 A mixed model analysis was performed using PROC GLM in SAS 9.0 (SAS Institute 2002) to  
158 partition variation into genotype, environment, genotype-by-environment interaction, and  
159 error variances for each trait with all sources of variation considered random. This analysis was  
160 done for inbred traits per se, hybrid traits per se, and heterosis for all 25 traits. Pearson  
161 correlation coefficients and corresponding significant tests was conducted using PROC CORR in  
162 SAS 9.0 (SAS Institute 2002). A mixed linear model was constructed by PROC MIXED in SAS 9.0  
163 (SAS Institute 2002) to get the best linear unbiased prediction for each hybrid and inbred across  
164 the 16 environments:  $y_i = \mu + f_i + e_i + \varepsilon_i$ , where  $y_i$  is phenotypic value of individual  $i$ ,  $\mu$  is the  
165 phenotypic mean of multiple environments,  $f_i$  is genotype effect,  $e_i$  is environmental effect,  
166 and  $\varepsilon_i$  is the residual effect. All the variables except  $\mu$  were considered as random effects  
167 (Bernardo 1994, 1996; Henderson 1975, 1984). The coefficient of variation (CV) for traits was  
168 calculated as the standard deviation divided by the plot mean. This is the most widely used  
169 parameter to quantify variability of traits with different units of measurement among individual  
170 plants and across environments (Munaro et al. 2011a).

171

#### 172 **Statement on data and reagent availability**

173 All raw phenotypic data is available in Supplemental Table 3 and GPS coordinates of locations  
174 and growth conditions are available in Supplemental Table 2.



175

## 176 **RESULTS AND DISCUSSION**

### 177 **Better parent heterosis is variable across traits, environments, and developmental time**

178 The majority of 25 measured traits exhibited significant genotype, environmental, and  
179 genotype-by-environment interaction effects in both the inbred lines and the hybrids across the  
180 16 environments as well as for BPH (see Table S4). Better-parent heterosis (BPH) was detected  
181 for most of the 25 traits, and 16 of them exhibited BPH in more than 90% of hybrids (Table 1).  
182 Only two traits, leaf number below the ear (LNB) and kernel depth (KD), exhibited BPH in fewer  
183 than 50% of the hybrids. The average BPH varied substantially among the different traits (Table  
184 1). Some traits such as grain yield per plant (GWT) exhibited BPH values greater than 90% BPH  
185 while other traits such as flowering time (DTA/DTS) exhibited a lower magnitude of BPH (-4.4 to  
186 -5.0%). However, for both of these traits the majority of hybrids exhibited BPH across all  
187 environments (Table 1).

188 The correlation of BPH across the traits studied varied substantially ranging from ( $r=-0.33$   
189 for EWT and PHT63 to 0.99 for EWT BPH and GWT BPH; Figure 1A and 1B), similar to previous  
190 observations (Flint-Garcia et al. 2009). A network visualization of the correlations between BPH  
191 for distinct traits revealed several trends (Figure 1B). Strong positive correlations were  
192 observed within groups of traits that likely share a common genetic, physiological and  
193 developmental basis, including yield related traits (cob, ear, and kernel traits) and vegetative  
194 traits including plant height at 14DAP through maturity and ear height (Figure 1A and 1B). Days  
195 to anthesis (DTS) BPH and plant height 63 days after planting (PHT63) BPH had strong negative  
196 correlations with grain weight (GWT) BPH, ear weight (EWT) BPH and ear width (EW) BPH

197 because the better parent was the one that flowered early, and the hybrids flowered generally  
198 earlier than the better parent. PHT63 BPH was correlated with both vegetative and reproductive  
199 plant traits, connecting the two subgroups (Figure 1B).

200 The 47 hybrids could be assigned into three general clusters based on their relative  
201 heterosis performance (rank number) across the 25 traits (Figure 1C). The first cluster (n=7)  
202 exhibited consistently lower BPH for all the traits relative to other hybrids and was significantly  
203 enriched (Table S5) for within heterotic group hybrids (NSS x NSS). Hybrids in the second cluster  
204 (n=18) showed relatively high heterosis for yield-related and flowering time traits, but lower  
205 heterosis for most of the vegetative traits, while hybrids in the third cluster (n=22) were the  
206 opposite (Figure 1C).

207 Among the 47 hybrids genotypes, identity by state values ranged from 0.67 to 0.86 for the  
208 widest and narrowest crosses. Genotype clusters 1, 2, and 3 had identity by state averages of  
209 0.755, 0.694, and 0.702 respectively. The hybrid genotypes in cluster 1, which had the lowest  
210 relative heterosis across all traits, was composed of relatively narrow crosses. The hybrid  
211 genotypes in cluster 2, which had the highest amount of heterosis across yield-related and  
212 flowering traits, was composed of relatively wide SSS x NSS crosses. This supports the historical  
213 convention of breeders crossing between heterotic pools of unrelated inbreds to maximize  
214 heterosis for yield related traits.

215

### 216 **There is low predictive capacity of heterosis over developmental time**

217 It is desirable to identify traits early in development that predict heterosis and yield at the end  
218 of the season. Previous reports indicate that traits measured at maturity showed the highest

219 level of heterosis (Falconer and Mackay 1996). However, it has been shown that heterosis could  
220 already be detected during early stages of maize seedling growth (Hoecker et al. 2006) and  
221 embryo development (Paschold et al. 2010; Meyer et al. 2007).

222 To determine the potential of heterosis based on early developmental stages to predict  
223 heterosis at later development stages we measured heterosis for plant height at seven  
224 developmental stages ranging from 14 days after planting to anthesis. A low correlation was  
225 observed between heterosis for plant height at early developmental stages and at anthesis  
226 (Figure 2). However, final plant height was more highly correlated with measures at  
227 developmental stages closer to anthesis. Overall, our results indicate that heterosis measured  
228 at the seedling stage is not predictive of heterosis at the adult stage.

229 These low levels of correlation could potentially be a product of low correlation for the  
230 hybrid performance, the better parent performance, or both. To evaluate what drives this  
231 reduced correlation in heterosis over increased windows of developmental time, correlation  
232 coefficients for hybrid performance over time and inbred performance over time were overlaid  
233 with heterosis correlations (Figure 2). Both hybrid performance and inbred performance  
234 showed a similar tendency over time, indicating that both hybrid and better parent  
235 performance have a comparable effect on the lack of correlation from early stages of  
236 development to maturity. Given the inability to predict heterosis levels, or even heterosis ranks,  
237 for the same trait (plant height) collected at different stages of development it is likely to be  
238 quite difficult to predict adult plant traits from seedling traits or to relate specific heterosis  
239 mechanisms observed in the seedling to those contributing to variation in heterosis for traits at  
240 maturity.

241

242 **Performance of hybrids is more stable than inbred lines within but not among environments**

243 Differential responses of maize hybrids and/or inbred lines to environmental stimuli will result  
244 in altered levels of heterosis across environments (Munaro et al. 2011b; Munaro et al. 2011a).  
245 Evidence from multiple species indicates that hybrids performance is more stable across  
246 environments than inbred performance (Cole et al. 2009). This observation is consistent with  
247 the concept of “buffering” in which heterogeneous populations or heterozygous individuals are  
248 more stable than homogeneous populations or homozygous individuals (Allard and Bradshaw  
249 1964; Schnell and Becker 1986; Cole et al. 2009). We compared the stability of inbred and  
250 hybrid traits both within an environment and among environments.

251 To evaluate stability across traits the coefficient of variation (CV) was used. The within plot  
252 CV for inbred lines in this study was greater than the within plot CV for hybrids for nearly every  
253 trait measured (Figure 3A), providing evidence for greater variability of inbred lines within  
254 environments for most traits. We also assessed the CV among environments for each trait in  
255 the inbred and hybrid lines (Figure 3B). For ten of the traits the inbred lines exhibited a  
256 significantly higher CV than the hybrids, indicating that for these traits instability across  
257 environments was driven more by the instability of inbred lines. However, for flowering time  
258 traits (DTA and DTS), hybrids had significantly higher CV than inbred lines across the  
259 environments. The remaining 13 traits did not exhibit significant differences between the  
260 hybrid and inbred lines for the CV among environments. For the plant height measurements  
261 over developmental time, the CV among environments decreased throughout time for both

262 inbred lines and hybrids, indicating increasing stability of both hybrids and inbred lines at later  
263 developmental stages.

264

### 265 **Factors influencing environmental variation for heterosis are variable across traits**

266 We were interested in assessing the factors contributing to the significant genotype-by-  
267 environment interaction effect on heterosis for most of the traits in this study. We focused on  
268 grain weight (GWT) and plant height at maturity (PHt). These traits have variable heritability,  
269 and BPH for these traits were not significantly correlated across genotypes or environments  
270 (Figure 1).

271 There were differences in the patterns of BPH among environments observed for GWT and  
272 PHt (Figure 4A and 4C). GWT generally expressed a greater BPH in low planting density  
273 environments, while planting density seemed to have little impact on BPH of PHt. For GWT, the  
274 correlation of IBS and BPH at high density was slightly higher ( $r=-0.58^{***}$ ) than for low density  
275 ( $r=-0.52^{***}$ ) indicating that BPH may be more affected by IBS at high density environments.  
276 However, both are highly correlated and IBS is affecting BPH under both conditions. For each of  
277 the traits the stability and average BPH was quite variable among hybrids (Figure 4). The hybrid  
278 that expressed the lowest and highest BPH based on BLUP values across all the environments  
279 were identified for each trait (indicated by arrows in Figure 4A and 4C). The stability of  
280 heterosis in these hybrids was evaluated across environments. Interestingly, for PHt the hybrid  
281 with the highest BPH exhibited consistently high levels of BPH while the hybrid with the lowest  
282 average BPH exhibited quite variable heterosis among environments (Figure 4D). However, this  
283 hybrid also had lower hybrid performance and therefore this result may be due to sensitivity to

284 variable neighbor effects. The opposite pattern was observed for the hybrids with highest and  
285 lowest average BPH for GWT (Figure 4C). This trend was consistent across the entire set of 47  
286 hybrids (see Figure S1). This may suggest that hybrids with the highest potential for GWT are  
287 the most responsive and have the potential to take advantage of favorable environments.

288 BPH is a measure of the difference in performance of the hybrid relative to the parents.  
289 Environmental influences on BPH could reflect changes in hybrid performance, changes in  
290 inbred performance or a combination of both. We investigated the patterns of BPH, hybrid  
291 performance and inbred performance for GWT and PHT in a selected set of hybrids (Figure 5).  
292 We first assessed the patterns for the hybrids with the highest average BPH for GWT (Figure 5A)  
293 and PHT (Figure 5E). We also assessed the patterns for the hybrid with the greatest (Figure 5B  
294 and 5F) or least (Figure 5C and 5G) standard deviation for BPH ranks among the environments.  
295 These reveal a variety of patterns in the trend of inbred and hybrid performance relative to  
296 variation in BPH values among environments. There are examples, such as Figure 5E, in which  
297 the reduction in heterosis in some environments is due to reduced hybrid performance with  
298 relatively stable inbred performance. In other examples, such as Figure 5C, the changes in  
299 heterosis seem to be driven by changes in the inbred performance among the environments.

300 We proceeded to assess the relative contribution of variation in the inbreds and hybrids to  
301 the environmental variation for BPH for all 47 hybrids for GWT and PHT (Figure 5D and 5H).  
302 The correlation of better parent performance and BPH (y-axis) was plotted against the  
303 correlation of hybrid and BPH (x-axis). As expected, the performance of the better parent tends  
304 to be negatively correlated with heterosis while the performance of the hybrid is positively  
305 correlated with heterosis. If variation for better parent performance and hybrid performance

306 equally contribute to heterosis variation we would expect a slope of one in the regression line  
307 of this plot. The observed slope was less than one, indicating that variation in the hybrids was  
308 contributing slightly more to the observed BPH values than variation in the inbred lines. There  
309 are differences in the distribution of the correlation values for GWT (Figure 5D) and PHT (Figure  
310 5H). For GWT, 46 of 47 hybrids have a positive correlation between hybrid performance and  
311 heterosis (Figure 5D) suggesting that heterosis for GWT is influenced by hybrid performance in  
312 all genotypes. In contrast, there are a number of hybrids without significant correlations  
313 between hybrid performance and heterosis for PHT (Figure 5H).

314 We assessed the relative influence of better parent and hybrid variation on BPH for all 25  
315 traits measured in this study (Table S6). In the majority of cases the hybrid performance is  
316 positively correlated with heterosis while the better parent performance is negatively  
317 correlated with heterosis. However, the relative strength of the correlations varied among  
318 different traits. For traits such as KD, PHT, DW there was a much stronger correlation between  
319 better parent performance and heterosis. Environmental variation for heterosis for other traits  
320 such as CWT, KW, and EL are more strongly influenced by the hybrid performance (Table S6).  
321 Interestingly, GWT showed equal strength of correlation for both hybrid performance with  
322 heterosis and better parent performance with heterosis. There was, however, a significant  
323 negative correlation between “noise” (residual from ANOVA using BPH) and the correlation of  
324 better parent performance and BPH ( $r=-0.77^{***}$ ), which may impact the ability to accurately  
325 assess the relative contribution of inbreds and hybrids to observed BPH.

326 Corn yields have increased continuously since hybrids were first commercially grown in the  
327 1930s. However, the increase in yield of commercial hybrids has not been attributed to an

328 increase in heterosis (Fasoula and Fasoula 2005). Indeed, the percentage of heterosis has not  
329 changed substantially, and by some estimates has decreased slightly over time due to the  
330 higher percentage rate of gain in yield for inbred lines relative to hybrids (Duvick 1999; Troyer  
331 and Wellin 2009). Our data suggest that variation in the performance of inbred lines and hybrid  
332 lines in different environments will influence the amount of heterosis. The relative influence of  
333 hybrid variation and inbred variation on heterosis is variable across the traits that were  
334 measured in this study. It is worth noting that in some extreme environments inbred lines may  
335 be severely affected while hybrids are not, and this outcome will influence measures heterosis  
336 (Griffing and Zsiros 1971). However, in the moderate environments surveyed in this study we  
337 find important contributions of both hybrid and inbred performance to heterosis variation.

338

### 339 **ACKNOWLEDGEMENTS**

340 We thank Peter Hermanson, Brad Keiter and James Satterlee for technical assistance. This work  
341 was supported in part by the Minnesota Corn Research and Promotion Council (Project Number  
342 4108-16SP), the Minnesota Agricultural Experiment Station (Project 13-014), the Iowa Corn  
343 Growers, and Iowa State University's Plant Sciences Institute.

344

### 345 **LITERATURE CITED**

346 Allard, R.W., and A.D. Bradshaw, 1964 Implications of Genotype-Environmental Interactions in  
347 Applied Plant Breeding1. *Crop Science* 4 (5):503-508.  
348 Bernardo, R., 1994 Prediction of Maize Single-Cross Performance Using RFLPs and Information  
349 from Related Hybrids. *Crop Science* 34 (1):20-25.



- 350 Bernardo, R., 1996 Best Linear Unbiased Prediction of Maize Single-Cross Performance. *Crop*  
351 *Science* 36 (1):50-56.
- 352 Cole, C.B., D.T. Bowman, F.M. Bourland, W.D. Caldwell, B.T. Campbell *et al.*, 2009 Impact of  
353 Heterozygosity and Heterogeneity on Cotton Lint Yield Stability All rights reserved. No part  
354 of this periodical may be reproduced or transmitted in any form or by any means, electronic  
355 or mechanical, including photocopying, recording, or any information storage and retrieval  
356 system, without permission in writing from the publisher. Permission for printing and for  
357 reprinting the material contained herein has been obtained by the publisher. *Crop Science*  
358 49 (5):1577-1585.
- 359 Crow, J.F., 1998 90 years ago: the beginning of hybrid maize. *Genetics* 148 (3):923-928.
- 360 Dahal, D., B.P. Mooney, and K.J. Newton, 2012 Specific changes in total and mitochondrial  
361 proteomes are associated with higher levels of heterosis in maize hybrids. *Plant J* 72 (1):70-  
362 83.
- 363 de Abreu, E.L.F., M. Westhues, A. Cuadros-Inostroza, L. Willmitzer, A.E. Melchinger *et al.*, 2017  
364 Metabolic robustness in young roots underpins a predictive model of maize hybrid  
365 performance in the field. *Plant J*.
- 366 Duvick, D.N., 1999 Heterosis: Feeding People and Protecting Natural Resources, pp. 19-29 in  
367 *The Genetics and Exploitation of Heterosis in Crops*, edited by J.G. Coors and S. Pandey.  
368 American Society of Agronomy, Crop Science Society of America, Madison, WI.
- 369 East, E.M., 1908 Inbreeding in corn. *Conn. Agric. Exp. Stn. Rep.* (419-428).
- 370 Falconer, D., and T. Mackay, 1996 *Introduction to Quantitative Genetics (4th Edition)*.

- 371 Fasoula, D.A., and V.A. Fasoula, 2005 Bridging the productivity gap between maize inbreds and  
372 hybrids by replacing gene and genome dichotomization with gene and genome. *Maydica*  
373 50:49-61.
- 374 Flint-Garcia, S.A., E.S. Buckler, P. Tiffin, E. Ersoz, and N.M. Springer, 2009 Heterosis is prevalent  
375 for multiple traits in diverse maize germplasm. *PLoS One* 4 (10):e7433.
- 376 Frisch, M., A. Thiemann, J. Fu, T.A. Schrag, S. Scholten *et al.*, 2010 Transcriptome-based distance  
377 measures for grouping of germplasm and prediction of hybrid performance in maize.  
378 *Theoretical and Applied Genetics* 120 (2):441-450.
- 379 Griffing, B., and E. Zsiros, 1971 Heterosis associated with genotype-environment interactions.  
380 *Genetics* 68 (3):443-455.
- 381 Groszmann, M., R. Gonzalez-Bayon, R.L. Lyons, I.K. Greaves, K. Kazan *et al.*, 2015 Hormone-  
382 regulated defense and stress response networks contribute to heterosis in Arabidopsis F1  
383 hybrids. *Proc Natl Acad Sci U S A* 112 (46):E6397-6406.
- 384 Groszmann, M., I.K. Greaves, Z.I. Alvertyn, G.N. Scofield, W.J. Peacock *et al.*, 2011 Changes in  
385 24-nt siRNA levels in Arabidopsis hybrids suggest an epigenetic contribution to hybrid vigor.  
386 *Proc Natl Acad Sci U S A* 108 (6):2617-2622.
- 387 Henderson, C.R., 1975 Best linear unbiased estimation and prediction under a selection model.  
388 *Biometrics* 31 (2):423-447.
- 389 Henderson, C.R., 1984 *Applications of Linear Models in Animal Breeding*: Guelph, Ont:  
390 University of Guelph.
- 391 Hirsch, C.N., J.M. Foerster, J.M. Johnson, R.S. Sekhon, G. Muttoni *et al.*, 2014 Insights into the  
392 maize pan-genome and pan-transcriptome. *Plant Cell* 26 (1):121-135.

- 393 Hoecker, N., B. Keller, H.P. Piepho, and F. Hochholdinger, 2006 Manifestation of heterosis  
394 during early maize (*Zea mays* L.) root development. *Theor Appl Genet* 112 (3):421-429.
- 395 Janick, J., 1998 Hybrids in horticultural crops. *Concepts and breeding of heterosis in crop plants*  
396 (conceptsandbree):45-56.
- 397 Kaepler, S., 2012 Heterosis: Many Genes, Many Mechanisms&#x2014;End the Search for an  
398 Undiscovered Unifying Theory. *ISRN Botany* 2012:12.
- 399 Melchinger, A.E., and R.K. Gumber, 1998 Overview of heterosis and heterotic groups in  
400 agronomic crops. *Concepts and breeding of heterosis in crop plants* (conceptsandbree):29-  
401 44.
- 402 Meyer, S., H. Pospisil, and S. Scholten, 2007 Heterosis associated gene expression in maize  
403 embryos 6 days after fertilization exhibits additive, dominant and overdominant pattern.  
404 *Plant Mol Biol* 63 (3):381-391.
- 405 Miller, M., Q. Song, X. Shi, T.E. Juenger, and Z.J. Chen, 2015 Natural variation in timing of stress-  
406 responsive gene expression predicts heterosis in intraspecific hybrids of *Arabidopsis*. *Nat*  
407 *Commun* 6:7453.
- 408 Miller, N.D., N.J. Haase, J. Lee, S.M. Kaepler, N. de Leon *et al.*, 2017 A robust, high-throughput  
409 method for computing maize ear, cob, and kernel attributes automatically from images.  
410 *Plant J* 89 (1):169-178.
- 411 Munaro, E.M., K.E. D'Andrea, M.E. Otegui, A.G. Cirilo, and G.H. Eyhéribide, 2011a Heterotic  
412 Response for Grain Yield and Ecophysiological Related Traits to Nitrogen Availability in  
413 Maize. v. 51.

- 414 Munaro, E.M., G.H. Eyh rabide, K.E. D'Andrea, A.G. Cirilo, and M.E. Otegui, 2011b Heterosis  $\times$   
415 environment interaction in maize: What drives heterosis for grain yield? *Field Crops*  
416 *Research* 124 (3):441-449.
- 417 Paschold, A., C. Marcon, N. Hoecker, and F. Hochholdinger, 2010 Molecular dissection of  
418 heterosis manifestation during early maize root development. *Theor Appl Genet* 120  
419 (2):383-388.
- 420 Pordes, R., D. Petravick, B. Kramer, D. Olson, M. Livny *et al.*, 2007 The open science grid. *Journal*  
421 *of Physics: Conference Series* 78 (1).
- 422 Purcell, S., B. Neale, K. Todd-Brown, L. Thomas, M.A. Ferreira *et al.*, 2007 PLINK: a tool set for  
423 whole-genome association and population-based linkage analyses. *Am J Hum Genet* 81  
424 (3):559-575.
- 425 Riedelsheimer, C., A. Czedik-Eysenberg, C. Grieder, J. Lisec, F. Technow *et al.*, 2012 Genomic  
426 and metabolic prediction of complex heterotic traits in hybrid maize. *Nat Genet* 44 (2):217-  
427 220.
- 428 SAS Institute, 2002 The SAS system for windows version 9.0. *SAS Inst, Cart, NC*.
- 429 Schnable, P.S., and N.M. Springer, 2013 Progress Toward Understanding Heterosis in Crop  
430 Plants. *Annual Review of Plant Biology* 64 (1):71-88.
- 431 Schnell, F.W., and H.C. Becker, 1986 Yield and Yield Stability in a Balanced System of Widely  
432 Differing Population Structures in Zea Mays L. *Plant Breeding* 97 (1):30-38.
- 433 Scholten, S., and A. Thiemann, 2013 Transcriptome-Based Prediction of Heterosis and Hybrid  
434 Performance, pp. 265-279 in *Diagnostics in Plant Breeding*, edited by T. L bberstedt and  
435 R.K. Varshney. Springer Netherlands, Dordrecht.

- 436 Shull, G.H., 1908 The composition of a field of maize. *Journal of Heredity* 4 (1):296-301.
- 437 Shull, G.H., 1909 A pure-line method in corn breeding. *Journal of Heredity* 5 (1):51-58.
- 438 Thain, D., T. Tannenbaum, and M. Livny, 2005 Distributed computing in practice: the Condor  
439 experience. *Concurrency and Computation: Practice and Experience* 17 (2-4):323-356.
- 440 Troyer, A.F., 2006 Adaptedness and Heterosis in Corn and Mule Hybrids. *Crop Science* 46  
441 (2):528-543.
- 442 Troyer, A.F., and E.J. Wellin, 2009 Heterosis Decreasing in Hybrids: Yield Test Inbreds All rights  
443 reserved. No part of this periodical may be reproduced or transmitted in any form or by any  
444 means, electronic or mechanical, including photocopying, recording, or any information  
445 storage and retrieval system, without permission in writing from the publisher. Permission  
446 for printing and for reprinting the material contained herein has been obtained by the  
447 publisher. *Crop Science* 49 (6):1969-1976.
- 448 Zhang, L., Y. Peng, X. Wei, Y. Dai, D. Yuan *et al.*, 2014 Small RNAs as important regulators for the  
449 hybrid vigour of super-hybrid rice. *J Exp Bot* 65 (20):5989-6002.
- 450

451 **FIGURE LEGENDS**

452 **Figure 1.** Better parent heterosis (BPH) comparisons for 25 traits and 47 hybrids across 16  
453 environments. A) Pearson correlation coefficients ( $r$ ) of BPH between traits; gray shaded cells  
454 indicate missing data. B) Network visualization of Pearson correlation coefficients of BPH  
455 between traits. Only correlation coefficients less than -0.3 or greater than 0.3 are shown. Traits  
456 in yellow circles and green rectangles are reproductive and vegetative traits, respectively. Red  
457 line,  $r < -0.3$ ; gray line,  $0.3 < r < 0.5$ ; blue line,  $r > 0.5$ . C) Average BPH rank scaled with white (highest  
458 BPH rank) to dark blue (lowest BPH rank). Hybrid genotypes are followed by the parental  
459 identity by state value.

460

461 **Figure 2.** Correlation coefficient for percent better parent heterosis (%BPH), hybrid  
462 performance, and better-parent performance of plant height at different development stages in  
463 different environments. The numbers of 14-49 in x-axis indicate days after planting and PHT is  
464 plant height at physiological maturity.

465

466 **Figure 3.** Coefficient of variation within and across environments for hybrid and inbred  
467 genotypes. A) Coefficient of variation within plot (6 plants were phenotyped within each plot).  
468 B) Coefficient of variation across all available environments for each trait. In each figure blue  
469 and red colors indicate hybrid and inbred, respectively. BLUP values of all available  
470 environments for each hybrid and inbred were used. \* significant at  $p=0.05$ ; \*\* significant at  
471  $p=0.01$ ; \*\*\* significant at  $p=0.001$  in a two-tail t-test between the inbred and hybrid genotypes.

472

473 **Figure 4.** Percent better parent heterosis (%BPH) for grain weight (GWT) and plant height at  
474 maturity (PHt) for 47 hybrids across 16 environments. A and C) Heatmap of %BPH for GWT (A)  
475 and PHt (C); black shaded cells indicate missing data. The green and blue arrow in each plot  
476 indicates the hybrids that have the highest and lowest %BPH across all 16 environments based  
477 on BLUP values. Environments and hybrids were clustered using hierarchical clustering (trees  
478 not shown). B and D) Highest (indicated by green arrows in A and C) vs. lowest (indicated by  
479 blue arrows in A and C) %BPH hybrids across all environments for GWT (B) and PHt (D). Red  
480 dots are the eight low-density environments and black dots are the eight high-density  
481 environments. H7 is PHP02 x DK3IIH6, H30 is LH185 x DK3IIH6, H32 is LH198 x LH185, H34 is  
482 LH82 x W606S.

483  
484 **Figure 5.** Relationships among percent better parent heterosis (%BPH), hybrid, and better-  
485 parent performance. Plots A-D are for grain weight (GWT) and E-H are for plant height at  
486 maturity (PHt). A and E) Hybrids with the highest %BPH across 16 environments. B and F)  
487 Hybrids with the highest standard deviation of the rank of %BPH among all 47 entries. C and G)  
488 Hybrids with the lowest standard deviation of the rank of %BPH among all 47 entries. D and H)  
489 Correlation coefficient of hybrid vs. %BPH and better-parent vs. %BPH (BLUP value across 16  
490 environments for each hybrid). Colored dots represent the highest %BPH (red – A and E),  
491 highest standard deviation of the rank of %BPH (green – B and F), and lowest standard  
492 deviation of the rank of %BPH (blue – C and G). For A-C and E-G dots along the x-axis represent  
493 each of the 16 environments.

494

**Table 1. Summary of better parent heterosis (BPH) for 25 traits measured across 16 environments**

| Trait                         | Abbreviation | Locations | Plots | Average %BPH | % Entries with BPH <sup>a</sup> |
|-------------------------------|--------------|-----------|-------|--------------|---------------------------------|
| Plant Height 14 DAP           | PHt14        | 4         | 169   | 20.2         | 95.3                            |
| Plant Height 21 DAP           | PHt21        | 8         | 340   | 24.3         | 95.6                            |
| Plant Height 28 DAP           | PHt28        | 12        | 528   | 27.9         | 98.1                            |
| Plant Height 35 DAP           | PHt35        | 12        | 538   | 30.4         | 99.4                            |
| Plant Height 42 DAP           | PHt42        | 12        | 538   | 33.8         | 99.8                            |
| Plant Height 49 DAP           | PHt49        | 10        | 461   | 35.8         | 99.8                            |
| Plant Height 56 DAP           | PHt56        | 8         | 282   | 38.5         | 100.0                           |
| Plant Height 63 DAP           | PHt63        | 2         | 94    | 41.4         | 100.0                           |
| Plant Height Maturity         | PHt          | 16        | 716   | 27.9         | 100.0                           |
| Ear Height Maturity           | EH           | 16        | 716   | 36.5         | 99.3                            |
| Days to Anthesis <sup>b</sup> | DTA          | 16        | 670   | -4.4         | 82.1                            |
| Days to Silk <sup>b</sup>     | DTS          | 16        | 670   | -5.0         | 87.0                            |
| Leaf Number Above Ear         | LNA          | 12        | 538   | 7.6          | 53.9                            |
| Leaf Number Below Ear         | LNB          | 8         | 375   | 3.1          | 20.0                            |
| Cob Width                     | CW           | 16        | 714   | 8.8          | 82.1                            |
| Cob Length                    | CL           | 16        | 714   | 20.3         | 93.1                            |
| Cob Weight                    | CWT          | 16        | 714   | 50.5         | 91.2                            |
| Ear Width                     | EW           | 16        | 710   | 13.5         | 95.4                            |
| Ear length                    | EL           | 16        | 713   | 18.6         | 91.6                            |
| Ear Weight                    | EWT          | 16        | 714   | 84.9         | 98.9                            |
| Kernel Row Number             | KRN          | 16        | 713   | 7.2          | 58.6                            |
| Kernel Height                 | KH           | 16        | 710   | 26.1         | 89.6                            |
| Kernel Width                  | KW           | 16        | 709   | 8.7          | 59.4                            |
| Kernel Depth                  | KD           | 16        | 714   | 2.8          | 1.5                             |
| Per Plant Grain Weight        | GWT          | 16        | 714   | 91.4         | 99.4                            |

<sup>a</sup>Entry is the inbred/hybrid combination within an environment

<sup>b</sup>For these traits the better-parent performance was the lower value.



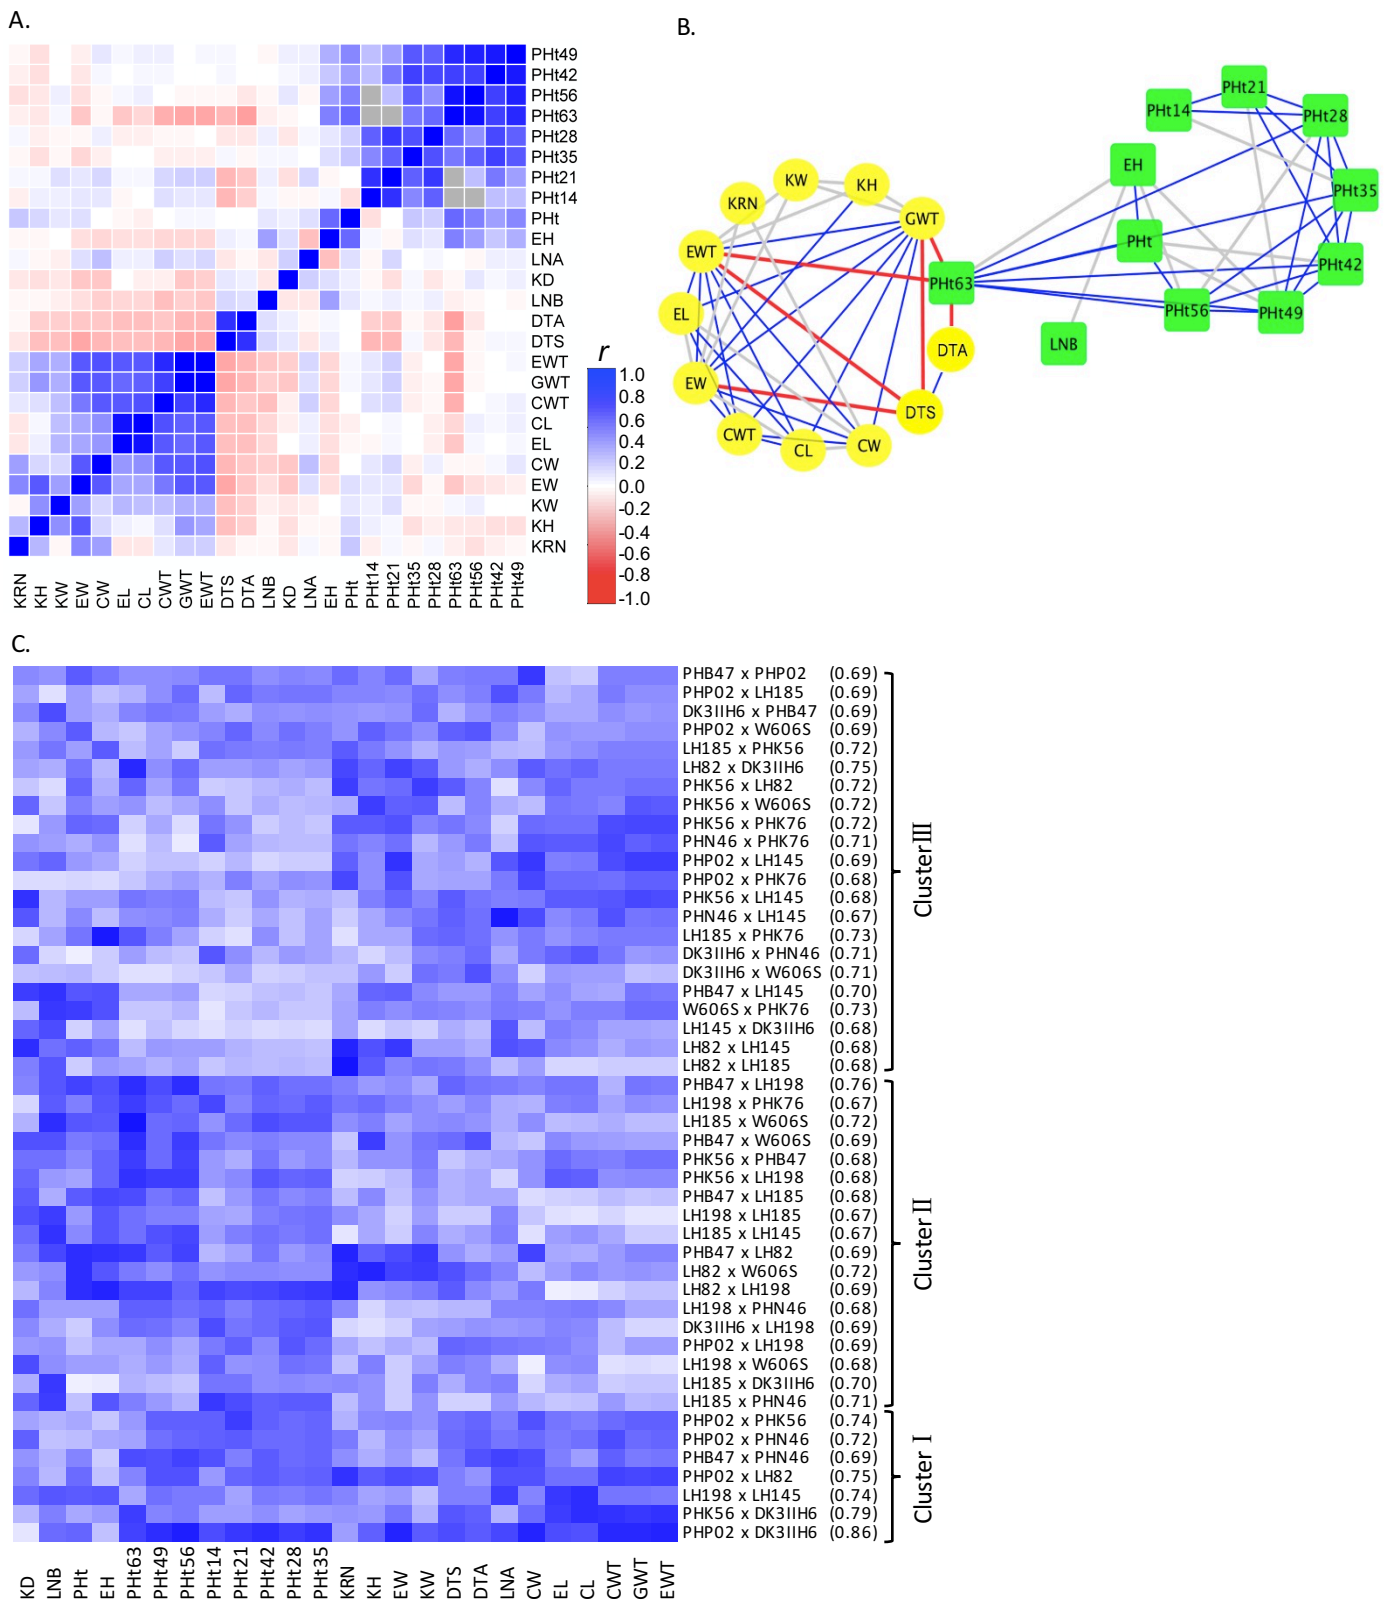

**Figure 1.** Better parent heterosis (BPH) comparisons for 25 traits and 47 hybrids across 16 environments. A) Pearson correlation coefficients ( $r$ ) of BPH between traits; gray shaded cells indicate missing data. B) Network visualization of Pearson correlation coefficients of BPH between traits. Only correlation coefficients that are less than -0.3 or greater than 0.3 are shown. Traits in yellow circles and green rectangles are reproductive and vegetative traits, respectively. Red line,  $r < -0.3$ ; gray line,  $0.3 < r < 0.5$ ; blue line,  $r > 0.5$ . C) Average BPH rank scaled with white (highest BPH rank) to dark blue (lowest BPH rank). Hybrid genotypes are followed by the parental identity by state value.

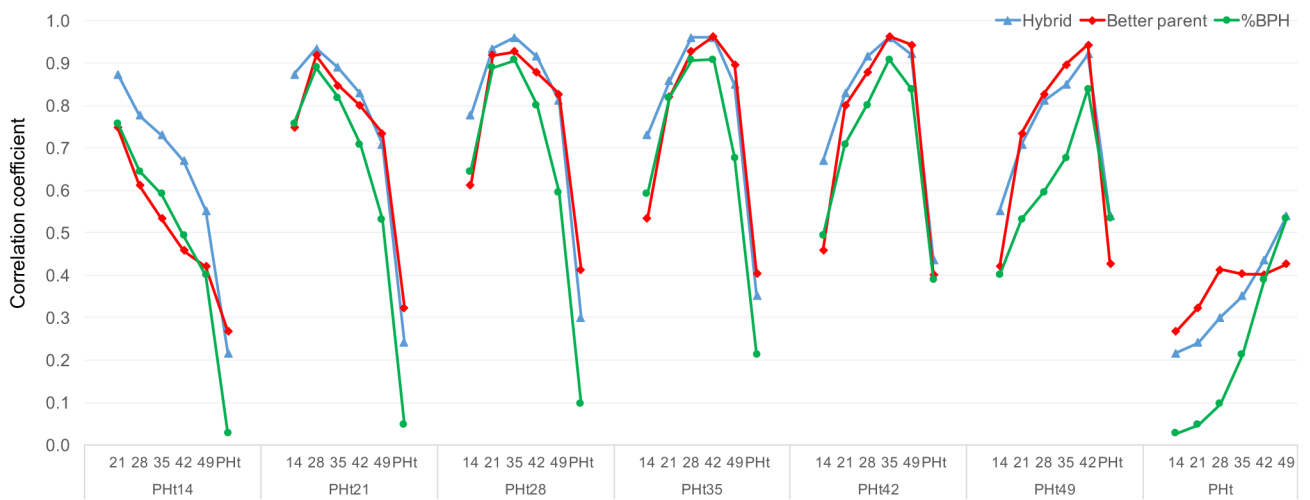

**Figure 2.** Correlation coefficient for percent better parent heterosis (%BPH), hybrid performance, and better-parent performance of plant height at different development stages in different environments. The numbers of 14-49 in x-axis indicate days after planting and PHt is plant height at physiological maturity.

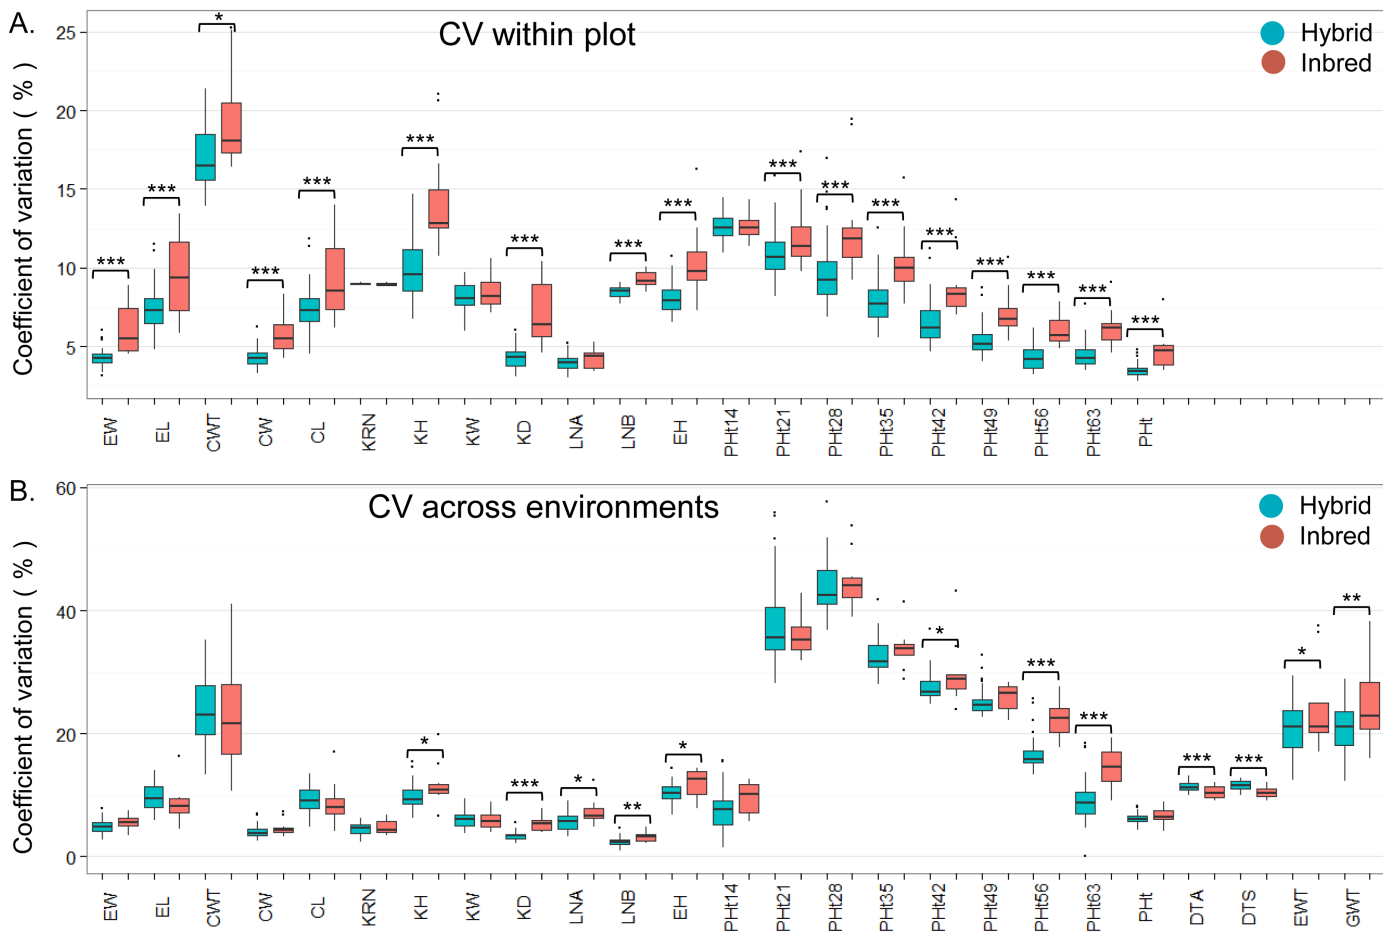

**Figure 3.** Coefficient of variation within and across environments for hybrid and inbred genotypes. A) Coefficient of variation within plot (6 plants were phenotyped within each plot). B) Coefficient of variation across all available environments for each trait. In each figure blue and red colors indicate hybrid and inbred, respectively. \* significant at  $p=0.05$ ; \*\* significant at  $p=0.01$ ; \*\*\* significant at  $p=0.001$  in a two-tail t-test between the inbred and hybrid genotypes.

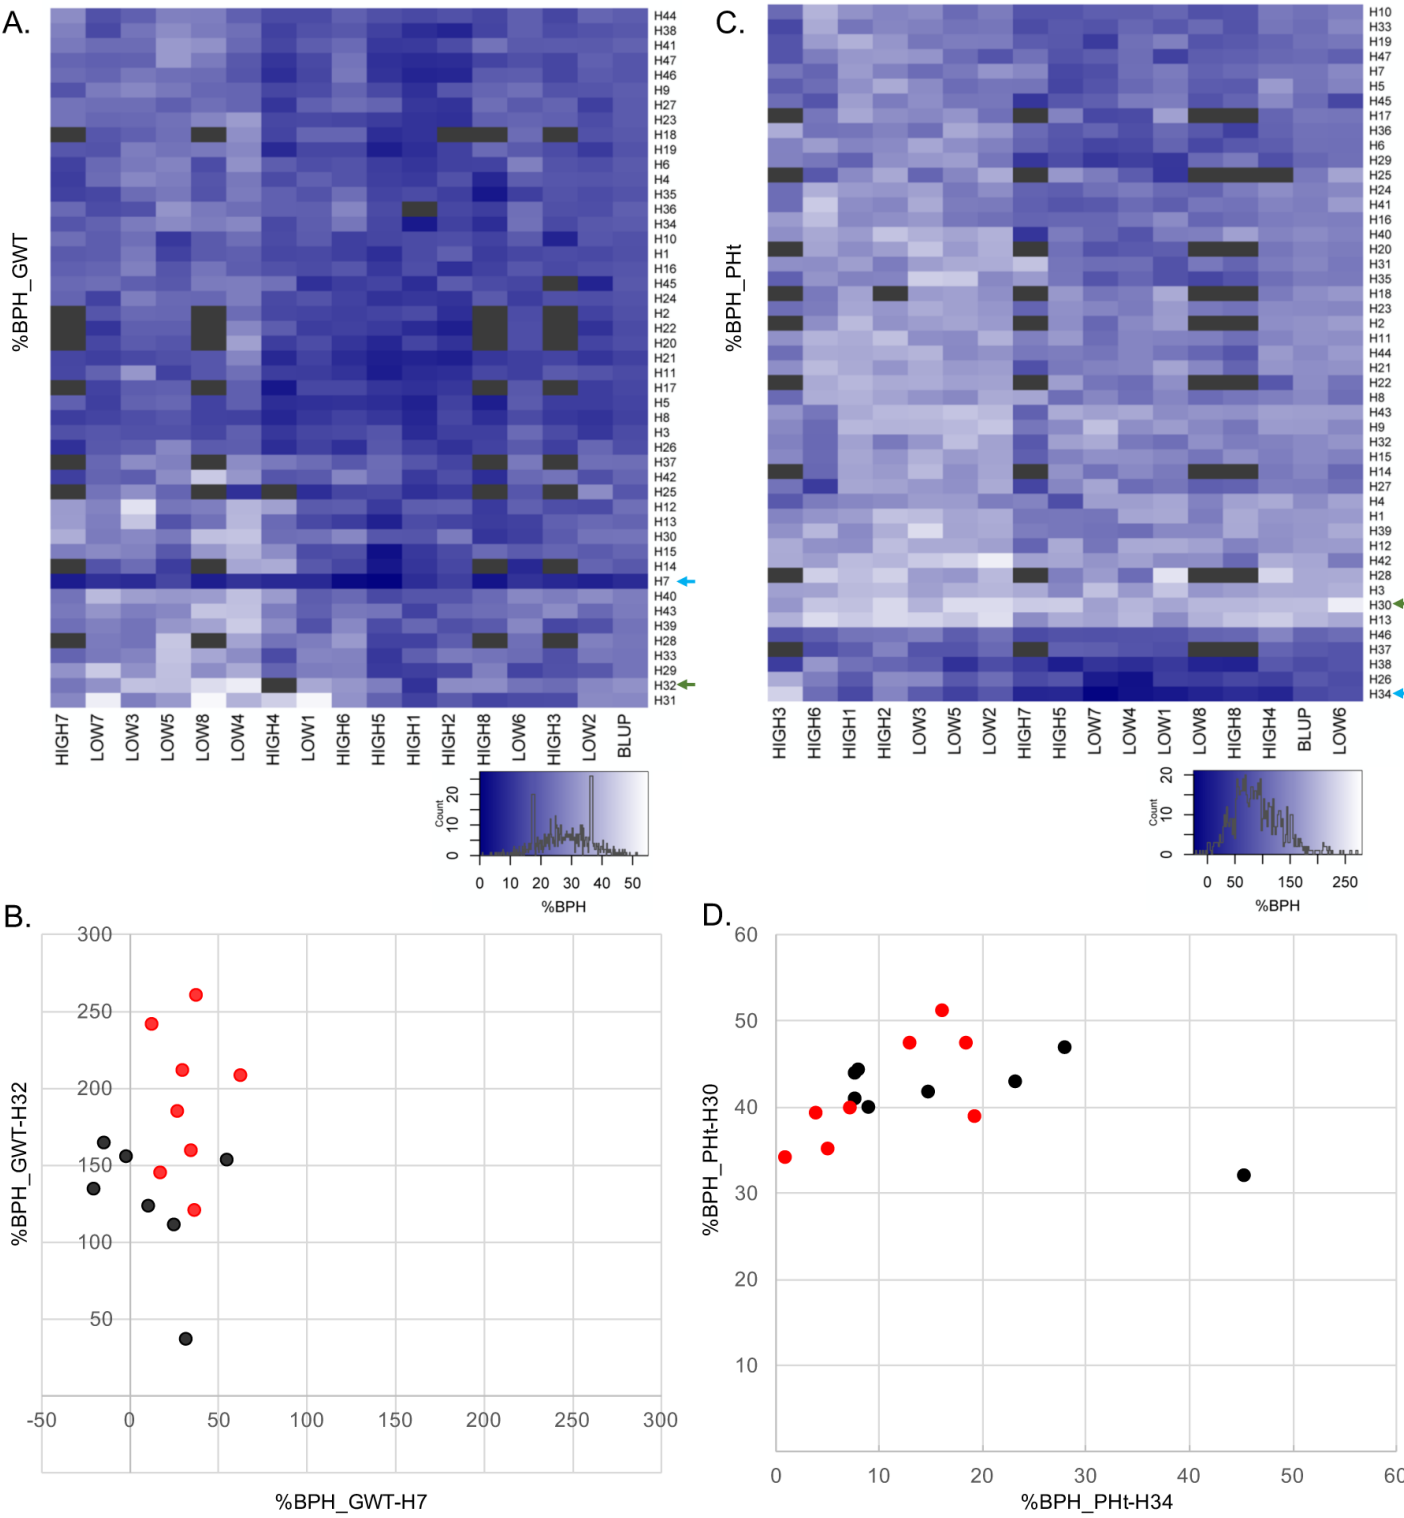

**Figure 4.** Percent better parent heterosis (%BPH) for grain weight (GWT) and plant height at maturity (PHT) for 47 hybrids across 16 environments. A and C) Heatmap of %BPH for GWT (A) and PHT (C); black shaded cells indicate missing data. The green and blue arrow in each plot indicates the hybrids that have the highest and lowest %BPH across all 16 environments based on BLUP values. Environments and hybrids were clustered using hierarchical clustering (trees not shown). B and D) Highest (indicated by green arrows in A and C) vs. lowest (indicated by blue arrows in A and C) %BPH hybrids across all environments for GWT (B) and PHT (D). Red dots are the eight low-density environments and black dots are the eight high-density environments. H7 is PHP02 x DK3IIH6, H30 is LH185 x DK3IIH6, H32 is LH198 x LH185, H34 is LH82 x W606S.

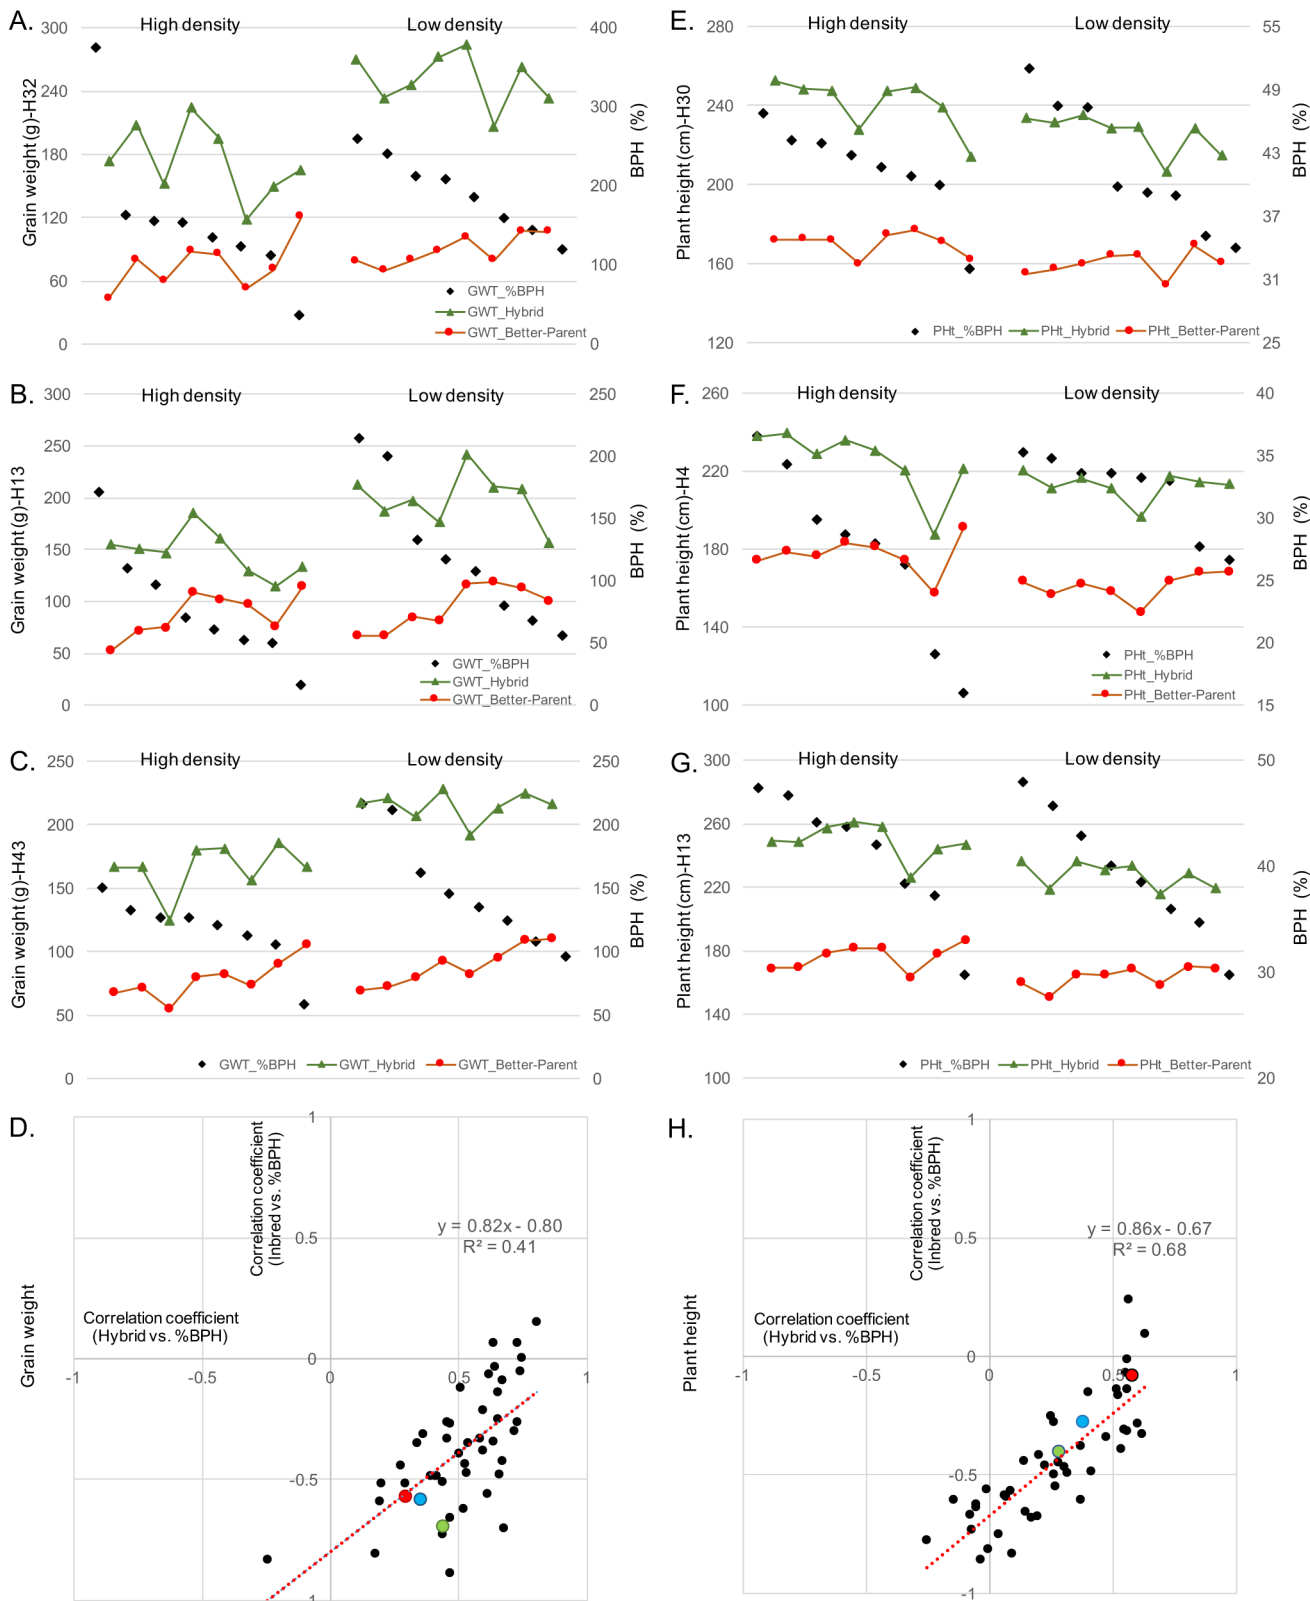

**Figure 5.** Relationships among percent better parent heterosis (%BPH), hybrid, and better-parent performance. Plots A-D are for grain weight (GWT) and E-H are for plant height at maturity (PHT). A and E) Hybrids with the highest %BPH across 16 environments. B and F) Hybrids with the highest standard deviation of the rank of %BPH among all 47 entries. C and G) Hybrids with the lowest standard deviation of the rank of %BPH among all 47 entries. D and H) Correlation coefficient of hybrid vs. %BPH and better-parent vs. %BPH (BLUP value across 16 environments for each hybrid). Colored dots represent the highest %BPH (red – A and E), highest standard deviation of the rank of %BPH (green – B and F), and lowest standard deviation of the rank of %BPH (blue – C and G). For A-C and E-G, dots along the x-axis represent each of the 16 environment.
